# Supplementary material for: Association between dietary inflammatory potential and breast cancer incidence and death: results from the Women's Health Initiative
Source: PubMed Central journal article supplement — Br J Cancer. 2016 Apr 21;114(11):1277–85. doi: 10.1038/bjc.2016.98 (PMC4891517; doi:10.1038/bjc.2016.98), 2016-04-21
Supplement: bjc201698x1.pdf [file bjc201698x1.pdf]

Supplemental Table 1. Hazard ratios of the association between the dietary inflammatory index and breast cancer incidence and death after excluding women whose breast cancer was not a first primary cancer; Women's Health Initiative (n=122,788), 1993-2014

|                                                                    | <b>Q1 (-7.055, &lt; -3.142) (more anti-inflammatory diet )</b> | <b>Q2 (-3.142, &lt; -2.016)</b> | <b>Q3 (-2.016, &lt; -0.360)</b> | <b>Q4 (-0.360, &lt;1.898)</b> | <b>Q5 (1.898, &lt;5.519) (more pro-inflammatory diet)</b> | <b><sup>a</sup>P<sub>trend</sub></b> |
|--------------------------------------------------------------------|----------------------------------------------------------------|---------------------------------|---------------------------------|-------------------------------|-----------------------------------------------------------|--------------------------------------|
| <b>Breast cancer incidence, n=7,093, n (%)<sup>b</sup></b>         | 1521 (6.21%)                                                   | 1443 (5.90%)                    | 1357 (5.54%)                    | 1443 (5.90%)                  | 1329 (5.43%)                                              |                                      |
| <sup>c</sup> HR (95%CI), age and energy-adjusted model             | 1.00                                                           | 0.96 (0.90, 1.04)               | 0.91 (0.84, 0.98)               | 0.97 (0.90, 1.04)             | 0.92 (0.89, 0.99)                                         | 0.08                                 |
| <sup>c</sup> HR (95%CI), multivariable-adjusted model <sup>d</sup> | 1.00                                                           | 0.97 (0.90, 1.04)               | 0.93 (0.86, 1.00)               | 0.99 (0.92, 1.07)             | 0.98 (0.90, 1.07)                                         | 0.86                                 |
|                                                                    | <b>Q1 (-7.055, &lt;-3.162)</b>                                 | <b>Q2 (-3.162, &lt;-2.032)</b>  | <b>Q3 (-2.032, &lt; -0.374)</b> | <b>Q4 (-0.374, &lt;1.874)</b> | <b>Q5 (1.874, 5.519)</b>                                  |                                      |
| <b>Breast cancer death; n=632, n (%)<sup>b</sup></b>               | 100 (0.50%)                                                    | 119 (0.59%)                     | 136 (0.68%)                     | 147 (0.73%)                   | 130 (0.65%)                                               |                                      |
| <sup>c</sup> HR (95%CI), age and energy-adjusted model             | 1.00                                                           | 1.23 (0.94, 1.60)               | 1.43 (1.10, 1.86)               | 1.57 (1.22, 2.04)             | 1.51 (1.15, 1.99)                                         | 0.001                                |
| <sup>c</sup> HR (95%CI), multivariable-adjusted model <sup>d</sup> | 1.00                                                           | 1.17 (0.89, 1.53)               | 1.33 (1.02, 1.73)               | 1.44 (1.11, 1.88)             | 1.31 (0.98, 1.76)                                         | 0.04                                 |

<sup>a</sup>the p-value for trend was obtained by assigning the median value of each DII quintile to all participants in each quintile; <sup>b</sup>the proportion of breast cancer events (cases or deaths) in the quintile; <sup>c</sup>HR=hazard ratio, CI=confidence interval; <sup>d</sup>adjusted for age, energy intake, race/ethnicity, income, education, smoking status, mammography within 2 years of baseline, age at menarche, number of live births, oophorectomy status, hormone therapy use, NSAID use, dietary modification trial arm, hormone therapy trial arm, body mass index and physical activity. Calcium and vitamin D (CaD) trial arm violated the proportional hazards assumption and all multivariable-adjusted models were stratified by CaD.

## **SUPPLEMENTAL MATERIAL: SHORT LIST OF WHI INVESTIGATORS**

**Program Office:** (National Heart, Lung, and Blood Institute, Bethesda, Maryland) Jacques

Rossouw, Shari Ludlam, Dale Burwen, Joan McGowan, Leslie Ford, and Nancy Geller

**Clinical Coordinating Center:** (Fred Hutchinson Cancer Research Center, Seattle, WA) Garnet

Anderson, Ross Prentice, Andrea LaCroix, and Charles Kooperberg

**Investigators and Academic Centers:** (Brigham and Women's Hospital, Harvard Medical

School, Boston, MA) JoAnn E. Manson; (MedStar Health Research Institute/Howard

University, Washington, DC) Barbara V. Howard; (Stanford Prevention Research Center,

Stanford, CA) Marcia L. Stefanick; (The Ohio State University, Columbus, OH) Rebecca

Jackson; (University of Arizona, Tucson/Phoenix, AZ) Cynthia A. Thomson; (University at

Buffalo, Buffalo, NY) Jean Wactawski-Wende; (University of Florida,

Gainesville/Jacksonville, FL) Marian Limacher; (University of Iowa, Iowa City/Davenport,

IA) Robert Wallace; (University of Pittsburgh, Pittsburgh, PA) Lewis Kuller; (Wake Forest

University School of Medicine, Winston-Salem, NC) Sally Shumaker

**Women's Health Initiative Memory Study:** (Wake Forest University School of Medicine,

Winston-Salem, NC) Sally Shumaker

---

*For a list of all the investigators who have contributed to WHI science, please visit:*  
<https://www.whi.org/researchers/Documents%20%20Write%20a%20Paper/WHI%20Investigator%20Long%20List.pdf>
